# Supplementary material for: Optimization analysis of active solar still using design of experiment method
Source: Copernicus journal article supplement (doi:10.5194/dwes-2020-22), 2020-07-27
Supplement: Supplementary file [file dwes-2020-22-AC2-supplement.pdf]

19 **Key words:** solar still, DOE, factorial design, thickness, productivity,  
20 water depth, insulation.

21

22 **Abstract:**

23 Mathematical model for different configurations of active solar still has been  
24 analyzed. Theoretical analysis of energy balance for the active solar still components  
25 has been developed. A statistical manner for examination, evaluation, and optimizing  
26 the performance of the active solar distillation system with known input factors has  
27 been performed using the Design of Experiments (DOE) method. Some processes  
28 with input variables (factors) and predicted output variables (responses) have been  
29 evaluated. Input factors influencing the responses have been identified. The impact of  
30 each variable (factor) and integration of two factors at the same time (called  
31 interactions) have been estimated. Influences of various factors on a particular study  
32 at a time rather than performing different separated studies have been investigated. 11  
33 variables (basin area, depth of saline water, external power, air blowing system,  
34 condenser material, condenser thickness, condenser area, insulation thickness,  
35 insulation material, ambient air temperature, and make-up water system ) have been  
36 studied to show their effects on three responses (mass output, saline water temperature  
37 and condenser cover temperature). The statistical results showed that the most  
38 significant factors effected on mass output (distilled water) were the external power,  
39 the depth of the saline water, and the basin area of the active still, respectively.  
40 Furthermore, the most influential factors affecting the saline water temperature and  
41 the condenser cover temperature were the depth of saline water, external power, and  
42 air blowing system respectively.

43

44

45

46

47

48

49

50

51

52 **Nomenclatures:**

53  $A_p$  basin Area ( $m^2$ )

54  $cp_b$  Basin Specific heat (J/kg.k)

55  $cp_w$  Water Specific heat (J/kg.k)

56  $cp_c$  Condenser Specific heat (J/kg.k)

57  $P_t$  External power ( $W/m^2$ )

58  $Q_{cb-w}$  Convection heat transfer from basin plate to saline water (W)

59  $Q_{cw-c1}$  Convection heat transfer from saline water to condenser (W)

60  $Q_{rw-c1}$  Radiation heat transfer from saline water to inner condenser (W)

61  $Q_{ew-c1}$  Evaporation heat transfer from saline water to inner condenser (W)

62  $Q_{cw-c1}$  Convection heat transfer from saline water to inner condenser (W)

63  $Q_{cc2-a}$  Convection heat transfer from outer condenser cover to ambient (W)

64  $Q_{rc2-sk}$  Convection heat transfer from outer condenser cover to sky (W)

65  $Q_{enc1-c2}$  Conduction heat transfer from inner condenser cover to outer condenser (W)

66  $Q_{loss-ba}$  Conduction heat transfer from basin plate to ambient (W)

67  $Q_{mw}$  Make-up saline water (W)

68  $T_b$  Basin temperature ( $C^\circ$ )

69  $T_c$  Condenser temperature ( $C^\circ$ )

70  $T_w$  Water temperature ( $C^\circ$ )

71  $m_b$  basin mass (Kg)

72  $m_w$  Inlet water mass (Kg)

73  $m_c$  Condenser mass (Kg)

74

75

76

77

## 1. Introduction:

78

79

80

81

82

83

84

85

86

87

88

89

Water is an essential component of human health. Nearly 60% of the human body is composed of water. It is important to note that the individual's need for water varies from person to another depending on the nature of the individual's daily physical activities and the drought proportion in the place where they live. Therefore, the individuals tend to drink sufficient amounts of water to prevent them from the drought. Consequently, it leads to drain the body's energy, and cause tired. The National Academy of Sciences has determined the amount of water that is recommended daily, namely 3.7 liters of water for males and 2.7 liters of water for females. In fact, these amounts include water obtained from drinking water, and eating other foods and beverages. Although three-quarters of earth is covered with water but, the clean water does not exceed 2.75%, which is a low proportion comparing with saltwater.

90

91

92

93

94

95

96

Improving the performance of solar still depends mainly on decreasing condenser cover temperature and increasing saline water temperature. Enhancing the productivity of solar still has received significant attention from many researchers. The daily production of solar still depends on several factors such as climatic conditions (solar radiation intensity, ambient temperature, and wind speed), condensation surface inclination, insulation type and thickness, solar still geometry, the orientation of still and depth of salty water.

97

98

99

100

101

102

103

104

105

106

107

108

109

110

111

112

113

114

115

116

**Bataineh and Abu Abbas<sup>a</sup>** (2020) studied numerically the effect of solar still productivity by adding vertical fins, external reflectors and both of them together at different seasons. The theoretical results show that the productivity has not been affected significantly by adding fins and the efficiency of still increase by 13%, 20%, 28%, 33%, 37% and 46% in June, April, September, October, January, and December respectively when adding external reflectors. **Bataineh and Abu Abbas<sup>b</sup>** (2020) investigated theoretically and experimentally, the effect of single sloped solar still performance when adding  $Al_2O_3$  and  $SiO_2$  nanoparticles. The results show that the productivity of still boosted by 10% and 8.5%, respectively, at 0.005 m saline water depth and 0.2% concentration of nanoparticles. **Manokar et al (2020)** analyzed the performance of pyramid solar still at different saline water thickness, solar still with insulation material and solar still without insulation material. The experimental results inferred that the performance of still increase as saline water depth decrease and the productivity of still is improved 113 by integrate insulation material in the still. **Khalifa et al (2009)** verified the effect of insulation thickness (3, 6 and 10 cm) on the efficiency of solar still. The experimental results described that the productivity of still increase as insulation thickness increase up to specific value (6 cm) beyond which the effect of increasing thickness become insignificant. Abu Abbas and Al-Abed Allah (2020) examined numerically the impact of condenser materials type and condenser incline on the performance of the solar still **under Jordan conditions**. The

117 results reveal that the daily solar still productivity increases as transmissivity value of  
118 condenser material increase. In addition, it was noted that the maximum productivity  
119 in summer (May) was at the lowest condenser slope angle ( $5^\circ$ ) and it was decreased as  
120 the condenser slope angle increased. On the other hand, the maximum productivity of  
121 solar still in the winter season (January) was at ( $20^\circ$ ) and then decreased as the  
122 condenser slope angle increased. Dubey and Mishra (2019) examined the influence of  
123 three glass cover angles ( $15^\circ$ ,  $30^\circ$ , and  $45^\circ$ ) on solar still productivity. They found that  
124 the maximum productivity was obtained at  $15^\circ$  tilt angle which was nearer to the  
125 latitude of Raghogarh, Guna. Kumar et al. (2008) examined the V-type solar still with  
126 floating charcoal absorber over the saline water in basin liner and with and without  
127 the boosting mirror. The yield increases with boosting the mirror, but overall  
128 efficiency reduces due to an increase in loss and condensate could be easily collected  
129 because of the collection at the center. Madhlopa et al. (2009) found out that utilizing  
130 multi evaporators and multi condensers have improved the solar still performance by  
131 62%. Hansen et al. (2017) enhanced solar still productivity by using fin shaped  
132 absorber configuration. Their results showed that the solar still efficiency increased by  
133 25.75%. E. Kabeel et al. (2018) investigated the effect of utilizing a different type of  
134 phase change materials (PCM) to enhance solar still performance. The theoretical  
135 results showed that the A48 type of PCM has the highest increase in efficiency reach  
136 up to 92%. Al-harahsheh et al. (2018) conducted an experimental study on single  
137 slope solar still integrated with phase change material and connected with a solar  
138 water collector to enhance basin water temperature of solar still. Zurigat et al. (2004)  
139 studied the effect of a regenerative concept on solar still performance. Their results  
140 illustrated that the performance of regenerative still concept is higher by 20%  
141 compared with conventional solar still. Nisrin Abdelal et al. (2018) conducted an  
142 experiment to study the effect of using absorber plates made of carbon  
143 fiber/nanomaterials-modified epoxy composites at different concentrations. Their  
144 results show that the productivity of still increase by 109% and 65% when adding 5%  
145 and 2.5% Nano weight concentrations respectively. Agrawal et al. (2017) conducted  
146 experimental and theoretical study to investigate the effect of saline water depth (2  
147 cm, 4 cm, 6 cm, 8 cm and 10 cm) on solar distillation system productivity. Their  
148 results illustrated that the distilled water of solar distillation system increases as  
149 decreasing water depth. Hitesh et al. (2012) examined the effect of floating plates  
150 (such as galvanized iron and aluminum) on solar still productivity. It was observed  
151 that the aluminum plate enhanced the productivity of still more than galvanized iron  
152 plate. Poblete et al (2016) investigated experimentally the effect of several factors on  
153 the efficiency of solar still such as heating of basin liner, condenser cover material,  
154 using reflectors (mirrors), air extractor, and the existence of a black-painted the floor  
155 in the solar still. The results showed that the factors (Mirror) and (Basin heated) are  
156 the most significant factors affecting productivity.

157

158

159 Design of Experiment is an efficient tool for increasing the quantity of data gained  
160 from a study in addition to reducing the amount of data to be obtained, which, in this  
161 case is decreasing the number of trial runs. It should be remarked that all of the  
162 researches have studied the influence of utilizing one parameter at a time while  
163 keeping the other parameters fixed will not occur to understand the interaction. Here  
164 in this research, we collected all the parameters that could affect the active solar still  
165 system to show which parameters have the most significant effect and which of them  
166 does not has any influence when they are being together at the same time. Moreover,  
167 to explain the interaction between the most significant factors and their regression  
168 equations. In addition to highlight on the most important factors that create the  
169 optimal design for active solar still system.

170

171

## 172 **2. Methodology:**

173

### 174 **2.1 Description:**

175 The main components of active solar distillation system are shown in Fig. 1. The  
176 water tank is used as a make-up water system to compensate purified water. An  
177 external power device is used to heat the basin plate. Large proportion of heat will  
178 transfer by convection to the saline water while the rest of it will be lost outside by  
179 conduction through the bottom and the sides of still. The heat will be conveyed from  
180 the high saline water temperature to the internal surface of cooled condensation cover  
181 by evaporation, convection and radiation. The heated saline water will convey heat to  
182 the inner cooled condensation cover by evaporation, convection and radiation. Then  
183 part of heat will be transferred by conduction between two sides (from the inner to the  
184 outer surface) of the condenser, and by radiation and convection from the upper  
185 surface of the condenser to the surrounding air. Inclined condensation cover is used to  
186 move evaporated water to the water collector. Bottom and all sides of solar distillation  
187 system have a specific insulation material with a proper thickness to eliminate heat  
188 losses from heated saline water to the surrounding. Moreover, Fig. 2a and Fig. 2b  
189 show solar still with increasing condensation cover area and adding fan respectively  
190 to enhance convection heat transfer from upper surface of inclined surface to the  
191 ambient air. as a result, increasing condensation rate. Fig. 3 shows distilled water  
192 cycle for solar distillation system.

193

194

195

196 **2.2 Mathematical model:**

197

198 A complete non linear differential equations model that shows the heat transfer and  
 199 energy processes in the main components of the active solar distillation system has  
 200 been written. These equations helped to calculate the quantity of the distilled water  
 201 temperature and the condenser cover temperature at any time and at different system  
 202 configurations. The theoretical results were founded by solving the main energy  
 203 balance equations for the basin plate, saline water, the inner and the outer condenser  
 204 covers of the active solar distillation system. The saline water, the basin plate, the  
 205 inner and the outer condenser cover temperatures were evaluated every 5 hours to  
 206 show the effect of changing different parameters on the solar distillation system  
 207 productivity. The numerical model was solved by Matlab software. Energy balance  
 208 equations for main solar still components are presented as follow:

209

210 As shown in Eq. (1), fraction of the external power connected with the solar  
 211 distillation system is transmitted to the basin plate as heat and then it is transferred to  
 212 saline water by convection. Other amount of energy is lost to the ambient through  
 213 bottom insulation material by conduction.

214

$$215 \quad P_t A_b = m_b c p_b \frac{dT_b}{dt} + Q_{cb-w} + Q_{loss-ba} \quad (1)$$

218

219 The transient energy balance equation for the saline water is given as Eq. (2),  
 220 fraction of heat is transmitted to saline water by convection. All heat gained is lost in  
 221 two approaches; specific quantity of energy is stored in saline water due to its specific  
 222 heat property. The rest of energy is released to the inner condenser cover by  
 223 evaporation, convection and radiation.

224

$$225 \quad Q_{cb-w} = m_w c p_w \frac{dT_w}{dt} + Q_{cw-c1} + Q_{ev-c1} + Q_{rw-c1} + Q_{mr} \quad (2)$$

227

228 Energy balance equation for the inner condenser cover is presented as Eq. (3). The  
 229 heat energy arrived from saline water surface is absorbed by the inner condenser  
 230 cover and then released by conduction through thickness of the cover.

$$231 \quad Q_{cw-c1} + Q_{ev-c1} + Q_{rw-c1} = m_c c p_c \frac{dT_{c1}}{dt} + Q_{cnc1-c2} \quad (3)$$

233

234 Energy balance equation for the outer condenser cover is shown as Eq. (4). The  
 235 heat lost by conduction to the outer condenser cover is transferred by convection to  
 236 the air and by radiation to the sky.

$$237 \quad Q_{cnc1-c2} = m_c c p_c \frac{dT_{c2}}{dt} + Q_{rc2-sk} + Q_{cc2-a} \quad (4)$$

239

240

## 241 **2.3 Design of Experimental:**

242

243 Design of Experimental is a valuable tool for researchers and designers which  
244 used to develop any system design. This tool can reduce designing time and cost with  
245 high reliability than other designing approaches. As it is known, the main purpose of  
246 conducting an experiment is to be found which system parameters have most  
247 significant on the specific response (output of the system). Using this tool, it will be  
248 known the effected factors that improve the system and neglect the fewer effected  
249 factors.

250

251 In this study, factorial design has been used to determine the most influence and  
252 not influence of 11 factors, interaction between them and regression equations for  
253 designing solar distillation system. Three responses have been evaluated which are  
254 distilled water, saline water temperature and inner condenser temperature.

255

### 256 **2.3.1 Factorial Design:**

257

258 A factorial design is an important type of design of experiments approaches. It is  
259 used to determine the most effected parameters to find the optimal design for the  
260 system of interest. Therefore, a huge time and tremendous effort could be saved  
261 instead of applying a full-scale simulation. Furthermore, the most valuable advantage  
262 of the factorial design is to find the regression equations and interactions between the  
263 factors that would be impossible to calculate in the other analysis approach. In order  
264 to achieve all the previous advantages, the factorial design method could set two  
265 values for each factor (levels), these levels and their values is determined by  
266 experience, then the researcher has to create configuration runs table using Minitab  
267 software according to probability counting rule ( $2^k$ ) where k is the number of factors  
268 each one has two levels (+1 value for a high level and -1 value for a low level.).  
269 Table. 1 below displays the main factors of interest

270

### 271 **2.3.2 Reduced Factorial $2^{(11-4)}$**

272

273 The main purpose of reduced factorial design that the system is performed with  
274 much less trials by sacrificing interactions for more than three factors. The reduced  
275 factorial which has been selected is  $2^k$  (k-r) where r refers to number of reduced  
276 factors. Moreover, reduced factors have been chosen very carefully by checking the  
277 alias structure, resolution, balancing and orthogonally. In this study a  $2^{(11-4)}$   
278 reduced factorial has been used with V resolution, which means that the main effects  
279 and two-way interactions not confounded except with higher order interactions.  
280 Matlab has been used to simulate the suitable and necessary simulations and Minitab  
281 to investigate the main influence factors and interactions between them with high  
282 accuracy.

283

284



### 3. Numerical simulation assessment

Fig. 4 shows the flowchart used to evaluate the most significant factors that have impacts on solar distillation system. The simulation starts with Minitab program to find the number of the solar still configurations using 11 factors. Determine type of analysis (reduced or full factorial), factors number and nature of runs (randomize or non-randomize runs) are the important steps in this software. Furthermore, a numerical model was written using Matlab program to analyze the effect of the solar still configurations calculated using Minitab program. Minitab is computer software which was developed to solve a mathematical model of the still components (condensation surface, saline water and basin plate) for different solar still configurations. The Temperature of the condensation cover, saline water and the basin plate were founded by solving the numerical model using Runge–Kutta method. All still components' temperatures and purified water were founded every 5 hours. Initial temperature values of different components of the solar still were equaled the ambient temperature value. Using these initial temperatures, the condensation cover, saline water and the quantity of distilled water were calculated. The procedures were repeated for every solar still configuration (run) which was taken from Minitab program. Finally, all solar still configurations results that calculated from MATLAB were analyzed using Minitab program to show their effects.

### 4. Results:

The results of mathematical and designing calculations could discover effect of different factors on active solar still responses. Three responses have been studied: amount of distilled water (mass output), water temperature, and condenser cover temperature. External power, basin area, water depth, insulation material, insulation thickness, condenser material (according to material thermal conductivity value), condenser area, thickness of condenser, air blowing system according to air speed (without air blowing = 0 m/s and with air blowing = 20 m/s), Make-up water system, and ambient temperature are considered as variables to understand their influences on the mentioned responses. To be more effective, the simulation results were gained based on the design of experiment approach (DOE). The (DOE) was conducted using a reduced factorial method to show their direct effects, their interactions, and the optimization design for the system.

#### 4.1 Main effect plots on the responses:

Fig. 5a, Fig. 5b and Fig. 5c showed the main factors influenced on the responses of active solar still system. The x axis shows responses values while the y axis shows the high and the low levels of the factors. It was clearly noted that, as inclination of the lines increase, the effect of the factors on the responses will be significant. The results found that the most important factors that enhance mass output are amount of external power, water depth, and basin area respectively. Where the mean mass output recorded at the high and low levels were 3.02 L and 1.24 L respectively for external power factor and 1.3L and 2.8L respectively for water depth factor. While, it is reached to about 2.8L and 1.4L at high and low levels of the basin area respectively. Moreover, other factors have a little effect on the system. The reason behind that can be explained in terms of the evaporation rate. As increasing the amount of external power, the basin water temperature increase. Therefore, the evaporation rate will be increased. Consequently, distilled water is boosted (Ahmed et al 2012). Moreover, as decreasing the basin water depth, the basin water temperature increases faster. Hence, the evaporation rate will be improved, and water productivity is enhanced (Agrawal et al. 2017). Furthermore, when increasing basin water area, the amount of distilled water is increased due to fact that the evaporation rate of the water in the solar still is directly proportional to the exposure area (V. Velmurugan and K. Srithar 2011). Also, as increasing the air speed on the upper condenser layer, the convection heat transfer is increased and then the condenser temperature will be decreased (El-Sebaili et al 2004). Furthermore, the simulation results indicated that the water depth, the amount of external power, the air blowing system, and the condenser material respectively are the main factors that have the most influence on the water temperature and condenser cover temperature of the system while rest factors have a little effect on it as shown in Fig. 5b. and Fig. 5c.

#### 4.2 Interaction effect plots:

The independent variables (factors) might interact with each other. It happens when the influence of one factor depends on the value of another factor. Moreover, the Interaction effects show that a third variable affects the relationship between an independent and dependent factor (responses). This kind of scheme represents the fit values of the dependent factor on the y-axis while the x-axis displays the values of the first independent factor while the different lines describe the values of the second independent factor. About the interaction schemes, parallel lines show that there is no interaction between the two factors while the crossed lines and the lines that will be crossed infer that there is an interaction effect between the factors. Here are the figures for the factors that produced an interaction between each other for various responses. Fig. 6a showed that the interaction effect on mass output. It was clearly

363 noted that (basin area\*external power), (basin area\*depth of water), (depth of  
364 water\*external power), (depth of water \* air blowing system) and (condenser material  
365 \*depth of water) respectively have the greatest interaction effect between each other.  
366 For example, the scheme for (basin area\*external power) explains that mass output  
367 level was higher when the external power and the basin area values were high.  
368 Conversely, the maximum mass output has been achieved when the external power  
369 and the basin area values were low. Fig. 6b showed effect of the interaction on water  
370 temperature of the active solar still .it was shown that the highest interaction to  
371 produce maximum water temperature were between (depth of water \* air blowing  
372 system), (condenser material \*depth of water), (depth of water\*condenser area),  
373 (external power \* air blowing system) and (depth of water\*external power)  
374 respectively. For example, the charts for (depth of water\*condenser area) and (depth  
375 of water\*air blowing) describe that the water temperature level is higher at a low level  
376 of water depth, and when condenser material and air blowing at the low level also. On  
377 the other hand, at a high level of water depth, the water temperature remains as to  
378 whether the condenser material and air blowing are at a high or low level. While the  
379 interaction plot affected on condenser temperature was described in Fig. 6c. Whereas  
380 the important interaction effect were (depth of water \* air blowing system),  
381 (condenser material \*depth of water), (power \* air blowing system), (depth of  
382 water\*condenser area) and (depth of water\*external power) respectively.

383

### 384 **4.3 Pareto charts of the standardized effects:**

385

386 Fig. 7 display the Pareto charts of the standardized effects for various responses.  
387 These charts determine the order of the most significant factors including main and  
388 interaction factors that effect on the response's values. It is clearly observed that the  
389 most influential factors on mass output are external power, depth of water, and basin  
390 area respectively. While in the water temperature and condenser cover temperature,  
391 the factors that have most significant effect are depth of water, external power, and air  
392 blowing system respectively.

### 393 **4.4 Regression equations:**

394 Regression has been conducted on the results of factorial to show the effects of  
395 these factors on the responses values. Eq. (5), Eq. (6), and Eq. (7) are the regression  
396 functions predicted from the reduced factorial study which find that the highest and  
397 lowest factors affected on three responses: distilled water, saline water temperature  
398 and condenser cover temperature respectively. The constant numbers refer to the  
399 factors affected ratio while the signals +, - refer to the high or low levels of the  
400 factors.

$$\begin{aligned} \text{Mass} = & -1.026 - 0.0349 A - 8.1 B + 0.480 C + 17.52 D + 0.0809 E + 4.67 F \\ & - 0.0715 G + 0.000990 H - 0.1068 J + 0.00196 K - 0.1711 L \\ & + 2.406 A*D - 23.92 C*D + 0.005022 C*H - 0.02169 D*H \\ & + 3.194 D*J + 1.554 D*L \end{aligned}$$

(5)

401

$$\begin{aligned} T_w = & 16.72 + 4.36 A + 3386 B + 17.19 C - 10.7 D - 3.52 E + 41.5 F \\ & - 0.627 G + 0.04329 H - 4.11 J + 0.0179 K - 0.761 L \\ & - 759 A*B + 1.166 A*E - 0.00571 A*H - 2617 B*C - 13448 B*D \\ & + 58.2 D*E - 0.1492 D*H + 80.9 D*J - 0.00433 E*H + 1.545 E*J - \\ & 0.00675 H*J \end{aligned}$$

(6)

402

403

$$\begin{aligned} T_c = & 10.21 + 3.61 A + 2095 B + 0.70 C + 97.3 D - 3.20 E + 50.4 F \\ & - 0.397 G + 0.04501 H - 3.61 J + 0.0436 K - 1.013 L - 1203 A*B \\ & + 77.4 A*D - 0.01053 A*H - 1.815 A*J - 18424 B*D + 60.7 D*E - \\ & 0.2414 D*H + 92.2 D*J - 0.00717 E*H + 1.633 E*J - 0.01207 H*J \end{aligned}$$

(7)

404

405

#### 406 4.5 Optimization Design:

407 The designers should create the system by selecting the value of the optimal  
 408 factors that could enhance mass output. As mentioned above, the maximum water  
 409 output produced from the solar still could be achieved through increasing the saline  
 410 water temperature and decreasing the condenser cover temperature. Table. 2 and 3 list  
 411 the fit values and optimal design selected respectively, to achieve the optimal value  
 412 for the mass output, saline water temperature and condenser cover temperature.

413

#### 414 5. Conclusion:

415 The results of theoretical and statistical analyses of 11 factors on the  
 416 active solar still system could be summarized as follows:

- 417 • The most important factors that can cause increasing in the mass output are the  
 418 amount of external power, water depth, and the basin area respectively.
- 419 • The thickness of the condenser and the ambient air temperature do not affect  
 420 the mean productivity
- 421 • Water depth, the amount of external power, the air blowing system, and the  
 422 condenser material, respectively, are the main factors that have the most  
 423 influence on the water temperature of the system.
- 424 • (Basin area\*power), (basin area\*depth of water), (depth of water\*power),  
 425 (depth of water \* air blowing system) and (condenser material \*depth of

- 426 water), respectively, have the greatest interaction effect between each other  
427 that influence on mass output
- 428 • The significant interaction affected on saline water and the condenser  
429 temperatures are (depth of water \* air blowing system), (condenser material  
430 \*depth of water), (power \* air blowing system), (depth of water\*condenser  
431 area) and (depth of water\*power) respectively.
  - 432 • The optimal design for the system can be attained is by selecting:
    - 433 ▪ Higher external power, basin area, condenser thickness, ambient  
434 temperature and insulation thickness.
    - 435 ▪ Lower condenser area and depth of water.
    - 436 ▪ Using steel condenser material and fiberglass insulations rather than  
437 any other materials.
    - 438 ▪ Adding air blowing system and removing make-up system.

439

#### 440 **Conflict of Interest**

441 The authors declare that they have no conflict of interest.

442

443

444

445

446

447

448

449

450

451

452

453

454

455

456

457 **References:**

458 Abdelal, N., & Taamneh, Y, Enhancement of pyramid solar still productivity using  
459 absorber plates made of carbon fiber/CNT-modified epoxy composites,Desalination,  
460 419(2017) 117–124. <https://doi.org/10.1016/j.desal.2017.06.012>

461 Al-Garni, Ahmed Z. "Enhancing the solar still using immersion type water heater  
462 productivity and the effect of external cooling fan in winter." Applied Solar Energy  
463 48.3 (2012): 193-200. <https://doi.org/10.3103/S0003701X12030048>

464 Agrawal, Abhay, R. S. Rana, and Pankaj K. Srivastava. "Heat transfer coefficients and  
465 productivity of a single slope single basin solar still in Indian climatic condition:  
466 Experimental and theoretical comparison." Resource-Efficient Technologies 3.4  
467 (2017): 466-482. <https://doi.org/10.1016/j.reffit.2017.05.003>

468 Al-harashsheh, Mohammad, et al. "Solar desalination using solar still enhanced by  
469 external solar collector and PCM." Applied Thermal Engineering 128 (2018): 1030-  
470 1040. <https://doi.org/10.1016/j.applthermaleng.2017.09.073>

471 Kumar, B. Selva, Sanjay Kumar, and R. Jayaprakash. "Performance analysis of a “V”  
472 type solar still using a charcoal absorber and a boosting mirror." Desalination 229.1-3  
473 (2008): 217-230. <https://doi.org/10.1016/j.desal.2007.09.009>

474 El-Sebaili, A. A. "Effect of wind speed on active and passive solar stills." Energy  
475 Conversion and Management 45.7-8 (2004): 1187-1204.  
476 <https://doi.org/10.1016/j.enconman.2003.09.036>

477 Kabeel, A. E., Y. A. F. El-Samadony, and Wael M. El-Maghlany. "Comparative study  
478 on the solar still performance utilizing different PCM." Desalination 432 (2018): 89- .  
479 96 <https://doi.org/10.1016/j.desal.2018.01.016>

480 Bataineh, Khaled M., and Mohammad Abu Abbas. "Improving the performance of  
481 solar still by using nanofluids, vacuuming, and optimal basin water  
482 thickness." DESALINATION AND WATER TREATMENT 173 (2020): 105-116.  
483 [doi: 10.5004/dwt.2020.24799](https://doi.org/10.5004/dwt.2020.24799)

484 Bataineh, Khaled M., and Mohammad Abu Abbas. "Performance analysis of solar  
485 still integrated with internal reflectors and fins." Solar Energy 205 (2020): 22-36.  
486 <https://doi.org/10.1016/j.solener.2020.04.059>

487 Khalifa, A. J. N., & Hamood, A. M. (2009). Effect of insulation thickness on the  
488 productivity of basin type solar stills: An experimental verification under local  
489 climate. Energy Conversion and Management, 50(9), 2457-2461. 2009.06.007.  
490 [doi:10.1016/j.enconman.](https://doi.org/10.1016/j.enconman)

491 Madhlopa, A.; Johnstone, C. Numerical study of a passive solar still with separate  
492 condenser. *Renewable Energy* 2009, 34(7), 1668–1677.2008.12.032.  
493 [doi:10.1016/j.renene](https://doi.org/10.1016/j.renene)

494 M. Dubey, D.R. Mishra, Experimental and Theoretical evaluation of double slope  
495 single basin solar stills: A study of heat and mass transfer, *FME Trans.* 47 (2019)  
496 101–110. [doi:10.5937/fmet1901101D](https://doi.org/10.5937/fmet1901101D).

497 Mohammad Omar Abu Abbas, Malik Yousef Al-Abed Allah "Effect of Condenser  
498 Materials Type and Condenser Slope on the Performance of Solar Still" Published in  
499 *International Journal of Trend in Research and Development (IJTRD)*, ISSN: 2394-  
500 9333, Volume-7, Issue-2, 268-274 , April 2020,  
501 URL: <http://www.ijtrd.com/papers/IJTRD22078.pdf>

502 Muthu Manokar, A., Taamneh, Y., Kabeel, A.E., Prince Winston, D., Vijayabalan, P.,  
503 Balaji, D., Sathyamurthy, R., Padmanaba Sundar, S., Mageshbabu, D., Effect of water  
504 depth and insulation on the productivity of an acrylic pyramid solar still – An  
505 experimental study, *Groundwater for Sustainable Development*, Volume 10, 100319  
506 doi: <https://doi.org/10.1016/j.gsd.2019.100319>, (2020).

507 Panchal, Hitesh, and Pravin K. Shah. "Investigation on solar stills having floating  
508 plates." *International Journal of Energy and Environmental Engineering* 3.1 (2012): 8.  
509 <https://doi.org/10.1186/2251-6832-3-8>

510 Poblete, Rodrigo, Guray Salihoglu, and Nezih Kamil Salihoglu. "Investigation of the  
511 factors influencing the efficiency of a solar still combined with a solar collector."  
512 *Desalination and Water Treatment* 57.60 (2016): 29082-29091.  
513 <https://doi.org/10.1080/19443994.2016.1202872>

514 Samuel Hansen, R.; Murugavel, K. Enhancement of integrated solar still using  
515 different new absorber configurations: An experimental approach. *Desalination* 2017,  
516 422, 59–67. [doi:10.1016/j.desal.2017.08.015](https://doi.org/10.1016/j.desal.2017.08.015).

517 Velmurugan, V., and K. Srithar. "Performance analysis of solar stills based on various  
518 factors affecting the productivity—a review." *Renewable and sustainable energy*  
519 *reviews* 15.2 (2011): 1294-1304. <https://doi.org/10.1016/j.rser.2010.10.012>

520 Zurigat, Yousef H., and Mousa K. Abu-Arabi. "Modelling and performance analysis  
521 of a regenerative solar desalination unit." *Applied thermal engineering* 24.7 (2004):  
522 1061-1072. <https://doi.org/10.1016/j.applthermaleng.2003.11.010>  
523  
524  
525

526 **List of figures**

527 **Figure 1.** Solar distillation system.

528 **Figure 2. (a)** increasing condensation cover area and **(b)** adding fan to solar still.

529 **Figure 3.** Distilled water cycle system.

530 **Figure 4.** System flow chart

531 **Figure 5.** main effect factors on **(a)** mass output, **(b)** water temperature and **(c)**  
532 condenser cover temperature.

533 **Figure 6.** Interaction effect plot on **(a)** mass output, **(b)** water temperature and **(c)**  
534 condenser cover temperature.

535 **Figure 7.** Pareto charts of the standardized effects for **(a)** mass output, **(b)** water  
536 temperature and **(c)** condenser cover temperature.

537

538 **List of Tables**

539 **Table 1:** Description of factor levels.

540

541 **Table 2.** Responses fit values

542 **Table 3.** Values for optimal solar still design

543

544

545

546

547

548

549

550

551

552

553

554



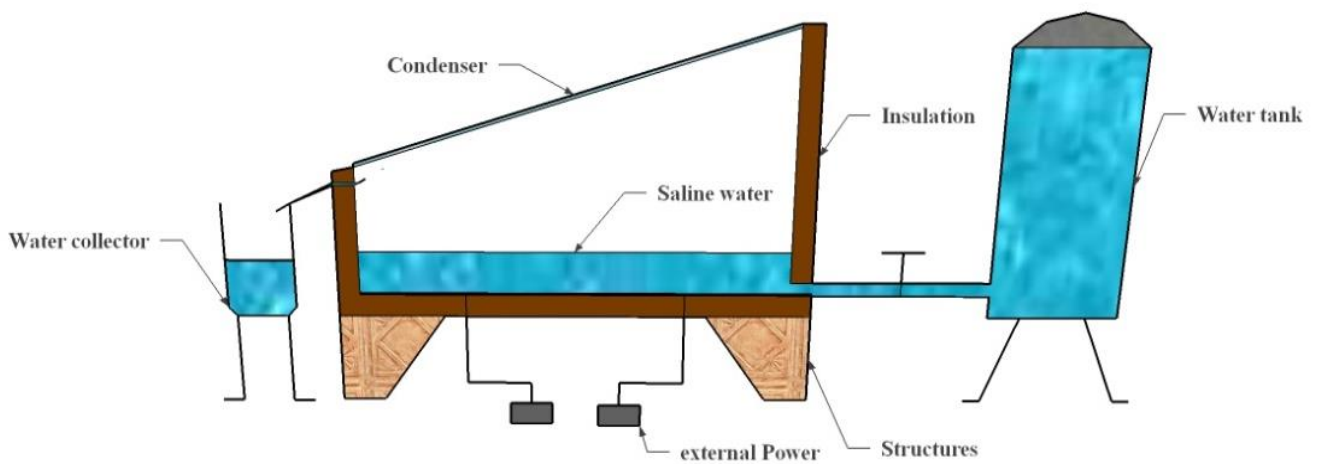

555 **Figure 1.** Solar distillation system.

556

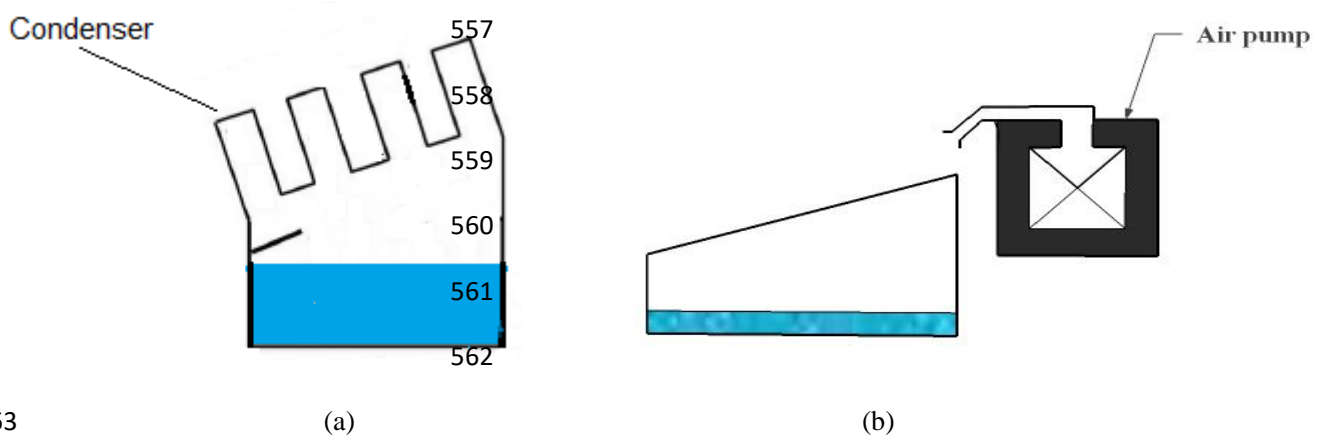

563

564 **Figure 2.** (a) increasing condensation cover area and (b) adding fan to solar still

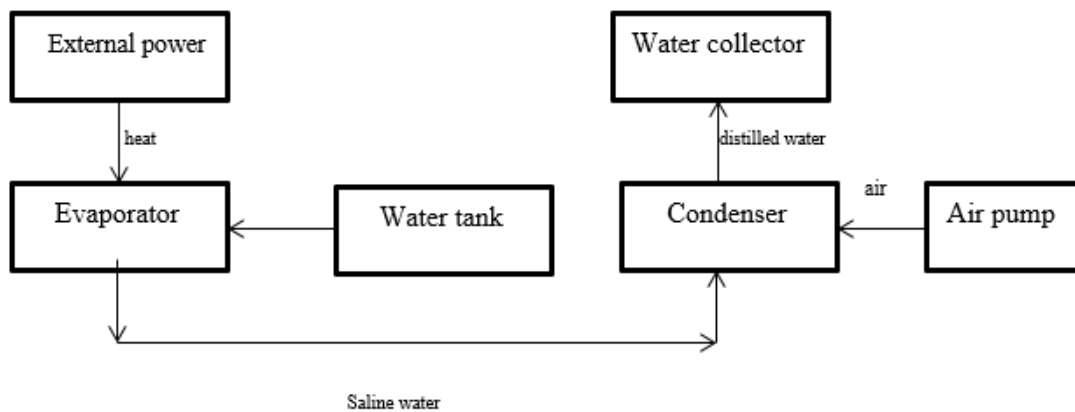

565 **Figure 3.** Distilled water cycle system.

566

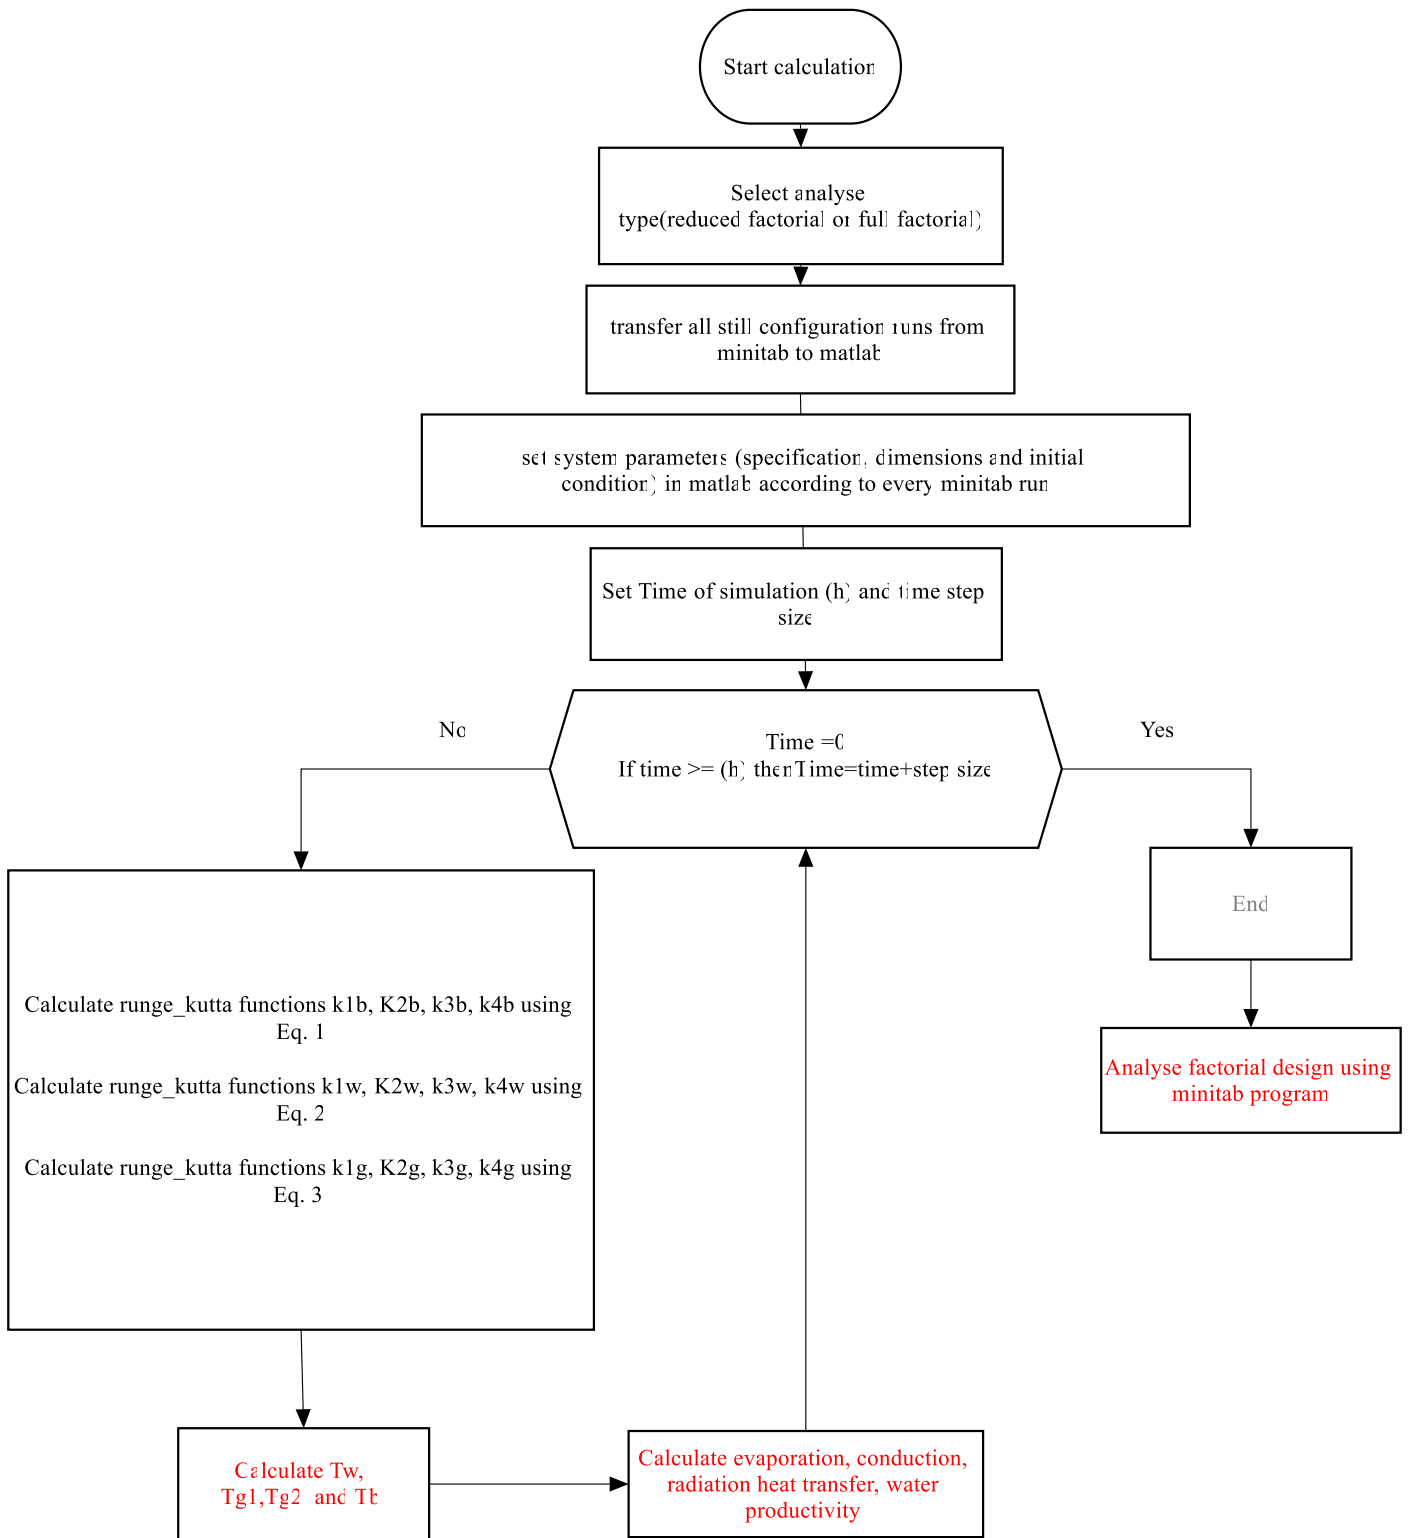

567

568

569

570

571

**Figure 4.** System flow chart

572

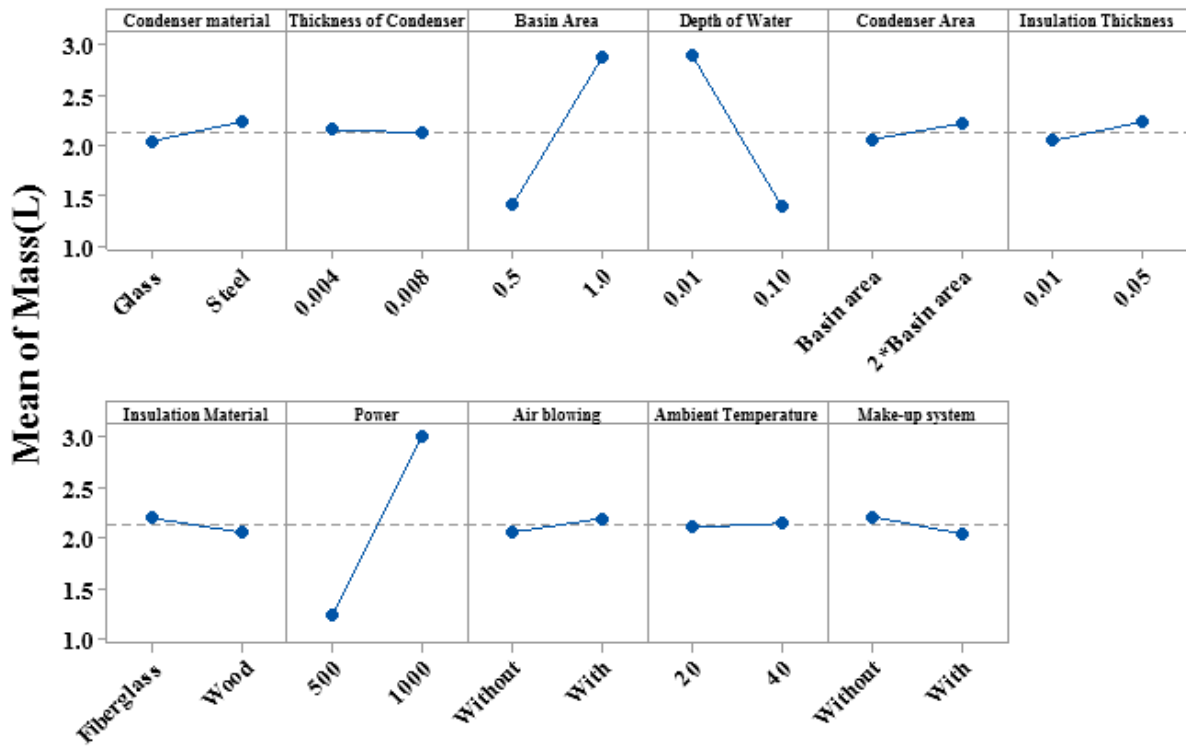

573

574

(a)

575

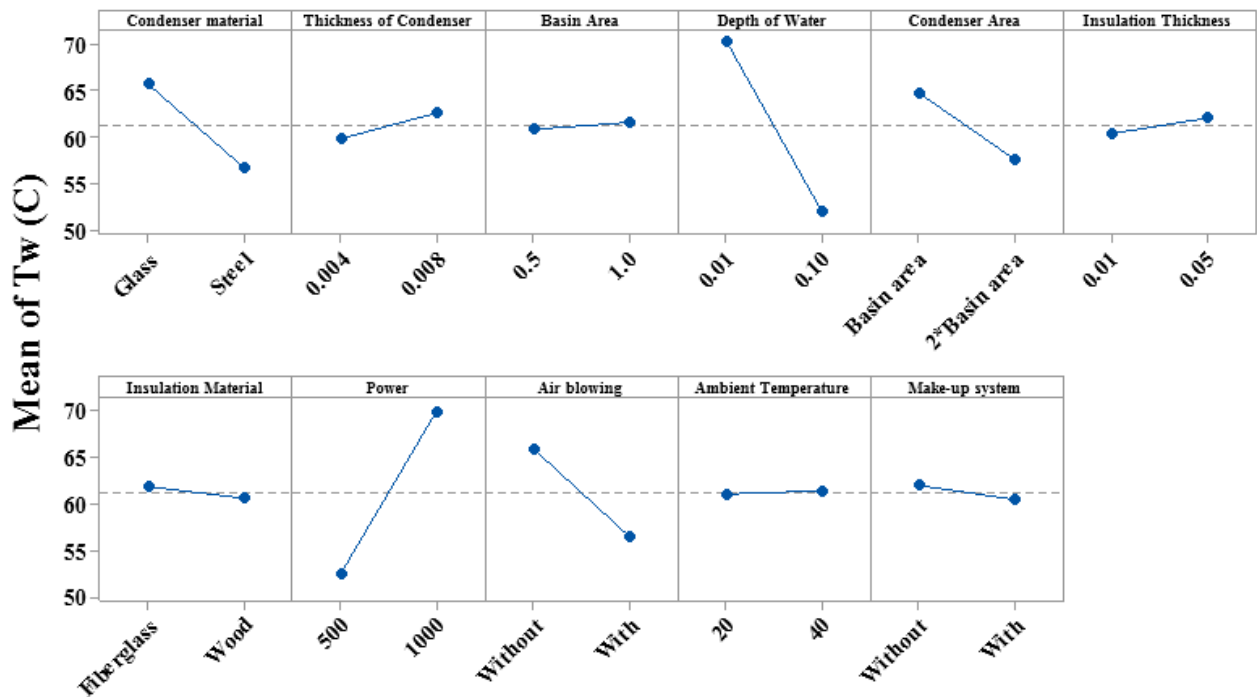

576

(b)

577

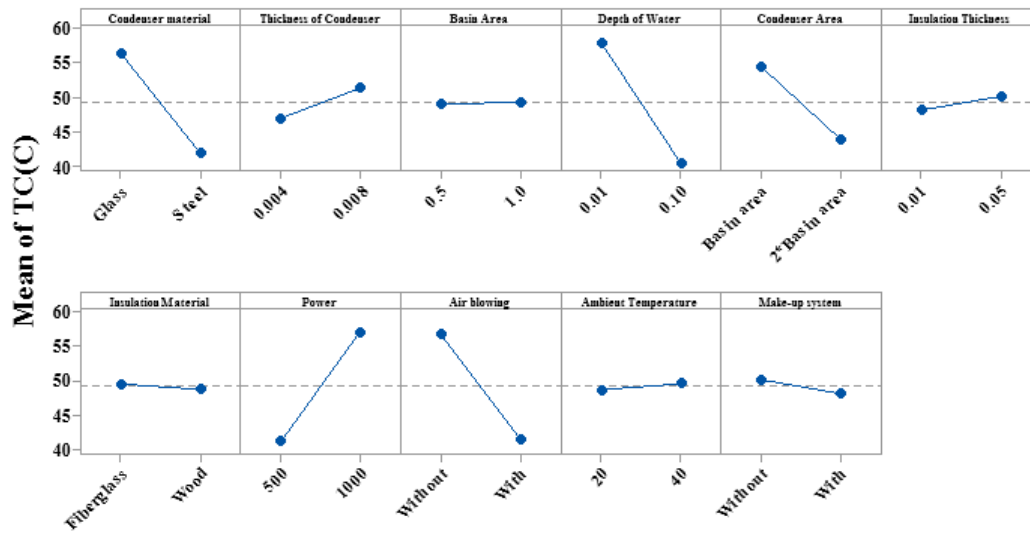

578

(C)

579

580 **Figure 5.** main effect factors on (a) mass output, (b) water temperature and (c)  
581 condenser cover temperature.

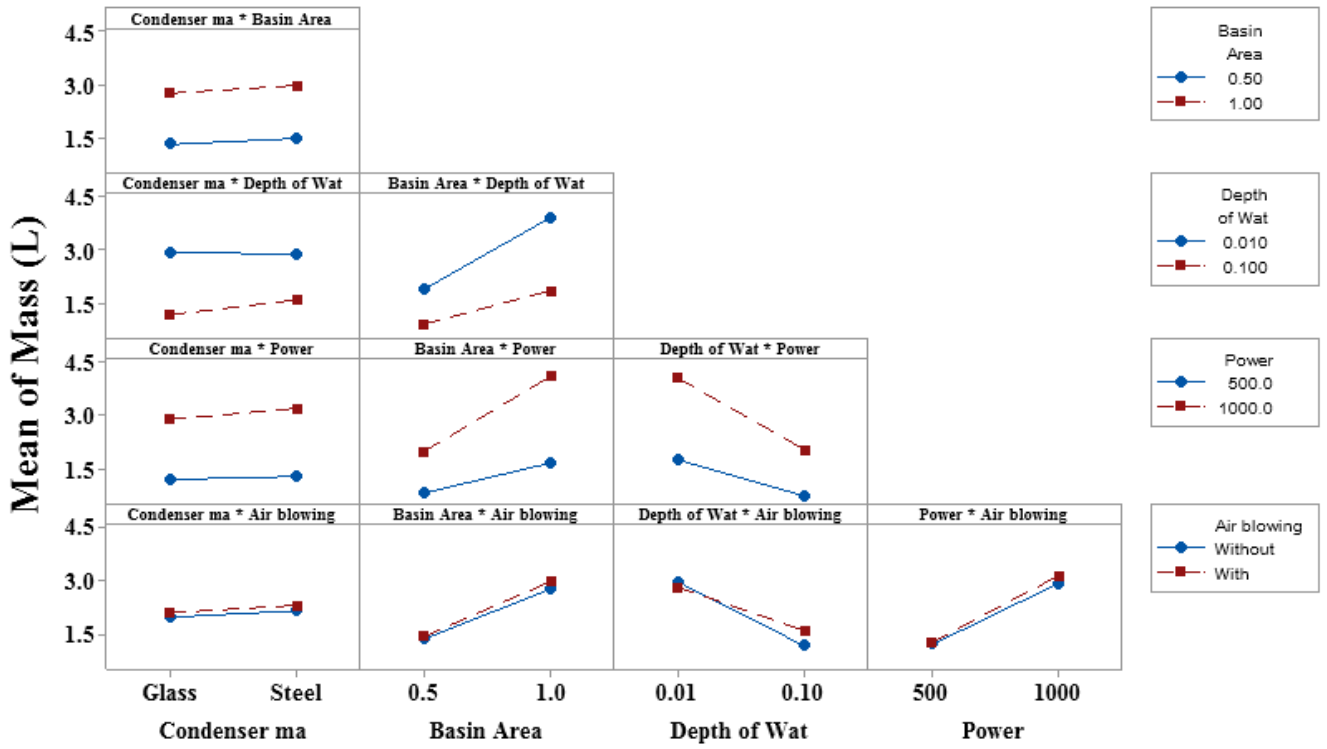

582

(a)

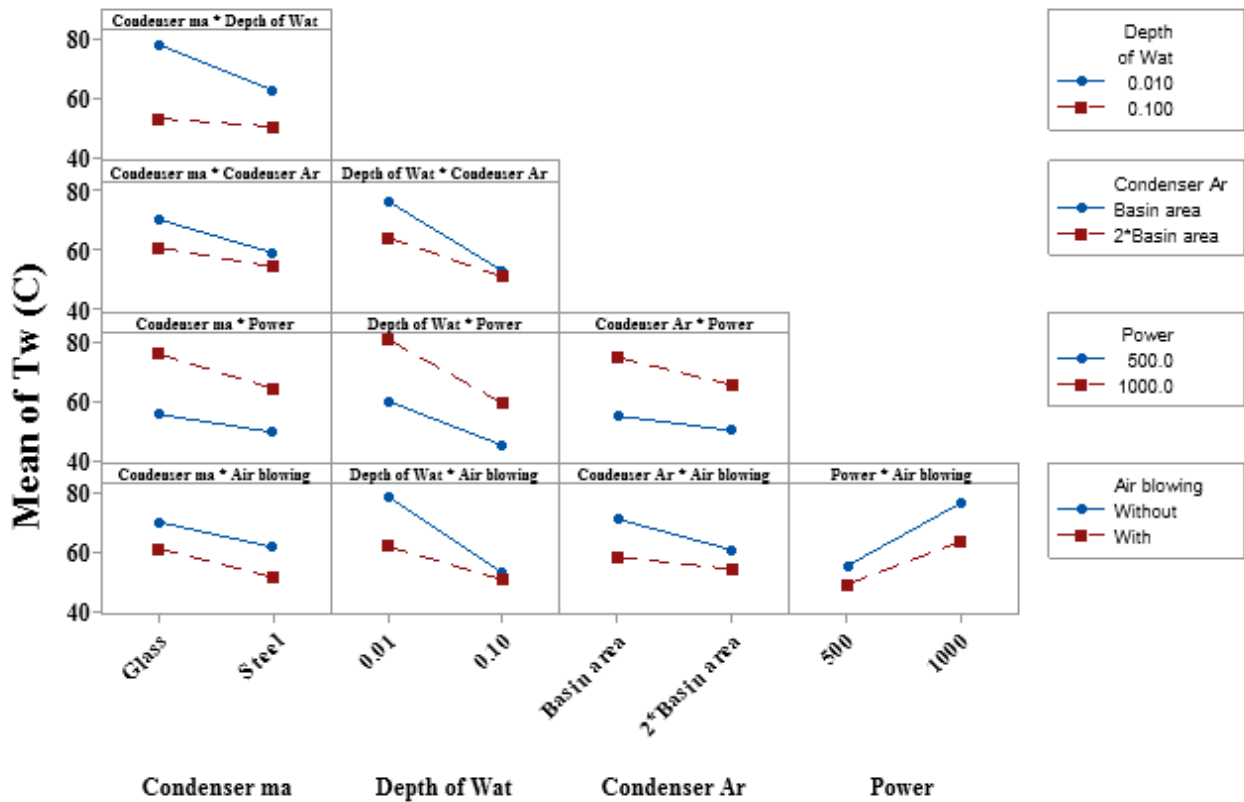

583

(b)

584

585

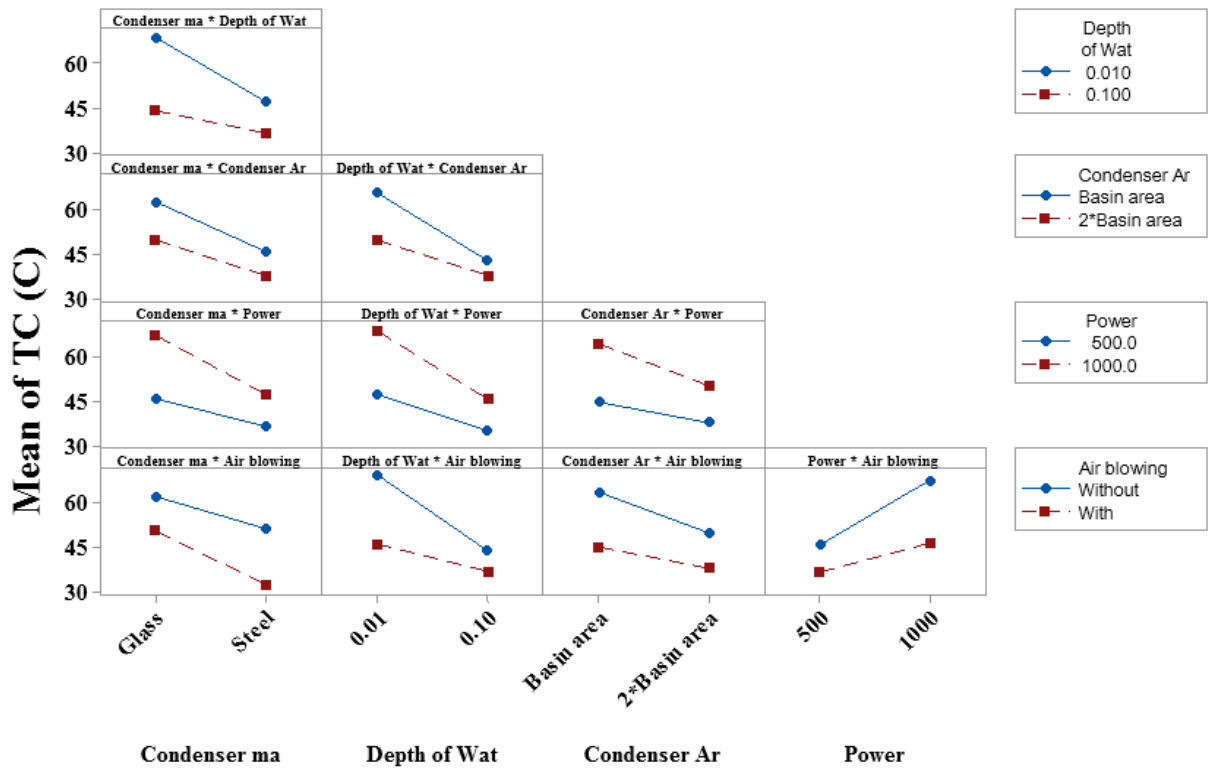

586

587

(c)

588 **Figure 6.** Interaction effect plot on (a) mass output, (b) water temperature and (c)  
589 condenser cover temperature.

590

591

592

593

594

595

596

597

598

599

### Pareto Chart of the Standardized Effects

(response is Mass;  $\alpha = 0.05$ ; only 30 effects shown)

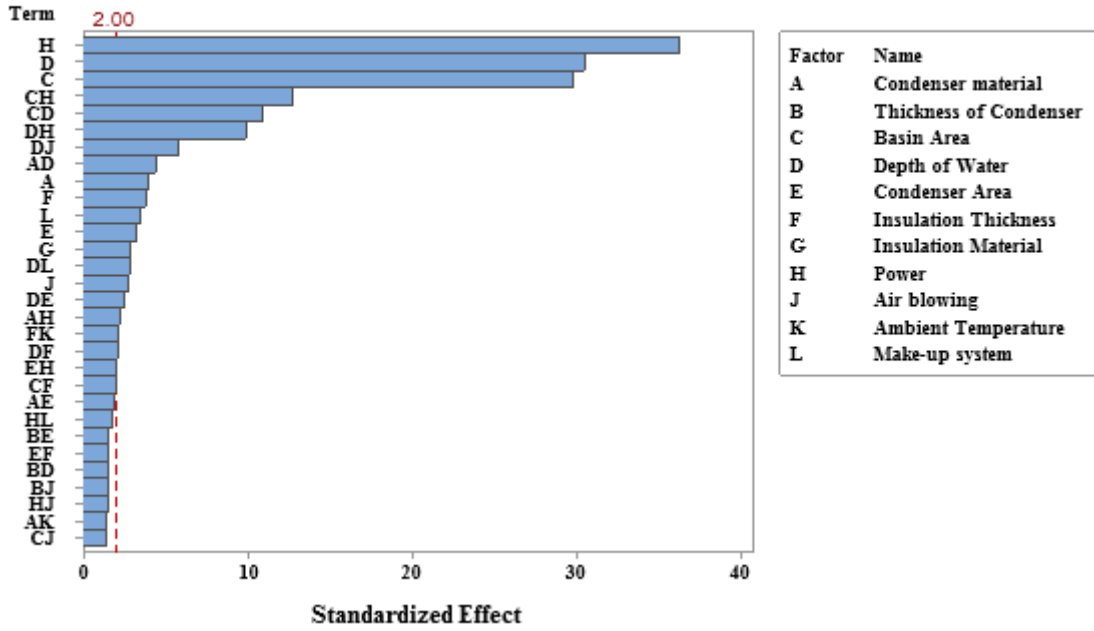

600  
601

(a)

602  
603

### Pareto Chart of the Standardized Effects

(response is Tw;  $\alpha = 0.05$ ; only 30 effects shown)

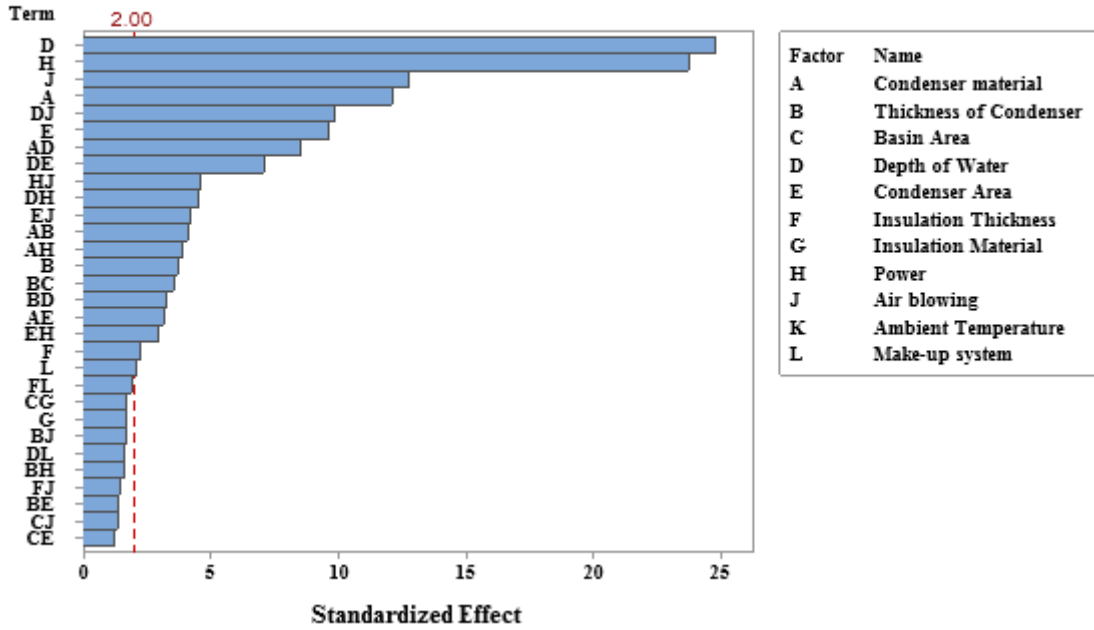

604  
605

(b)

**Pareto Chart of the Standardized Effects**  
 (response is Tc;  $\alpha = 0.05$ ; only 30 effects shown)

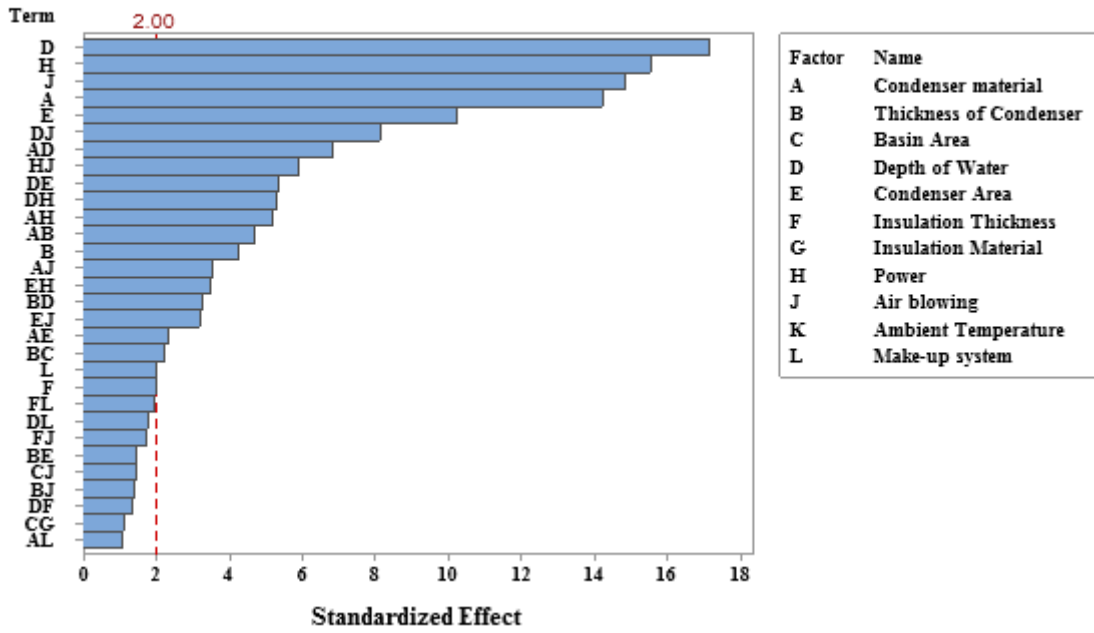

606  
 607

(c)

**Figure 7.** Pareto charts of the standardized effects for (a) mass output, (b) water temperature and (c) condenser cover temperature.

608  
 609  
 610  
 611  
 612  
 613  
 614  
 615  
 616  
 617  
 618  
 619  
 620  
 621  
 622



623 **Table 1:** Description of factor levels.

| Symbol | Factor Name            | Low Level  | High Level   | Unit           |
|--------|------------------------|------------|--------------|----------------|
| A      | Condenser Material     | Glass      | Steel        | -              |
| B      | Thickness of Condenser | 4          | 8            | mm             |
| C      | Basin Area             | 0.5        | 1            | m <sup>2</sup> |
| D      | Depth of Water         | 1          | 10           | cm             |
| E      | Condenser Area         | Basin Area | 2*Basin Area | m <sup>2</sup> |
| F      | Insulation Thickness   | 1          | 5            | cm             |
| G      | Insulation Material    | Fiberglass | Wood         | -              |
| H      | Power                  | 500        | 1000         | Watt           |
| J      | Air Blowing            | Without    | With         | -              |
| K      | Ambient Temperature    | 20         | 40           | C°             |
| L      | Make-up Water System   | Without    | With         | -              |

624

625 **Table 2.** Responses fit values

626

| Response | Goal    | Lower  | Target  | Upper   | Weight | Importance |
|----------|---------|--------|---------|---------|--------|------------|
| Tc       | Minimum |        | 29.238  | 121.323 | 1      | 1          |
| Tw       | Maximum | 43.080 | 122.702 |         | 1      | 1          |
| Mass     | Maximum | 0.306  | 6.474   |         | 1      | 1          |

630 **Table 3.** Values for optimal solar still design

631

632

633

634

635

| Solution | Condenser material | Thickness of Condenser | Basin Area | Depth of Water | Condenser Area | Insulation Thickness | Insulation Material |
|----------|--------------------|------------------------|------------|----------------|----------------|----------------------|---------------------|
| 1        | Steel              | 0.008                  | 1          | 0.01           | Basin area     | 0.05                 | Fiberglass          |

  

| Solution | Power | Air blowing | Ambient Temperature | Make-up system | Tc Fit | Tw Fit | Mass Fit | Composite Desirability |
|----------|-------|-------------|---------------------|----------------|--------|--------|----------|------------------------|
| 1        | 1000  | With        | 40                  | Without        | 54.2   | 73.5   | 5.9      | 0.635                  |
